# Supplementary material for: Feasibility of Longitudinal ctDNA Assessment in Patients with Uterine and Extra-Uterine Leiomyosarcoma
Source: MDPI journal article supplement (doi:10.3390/cancers15010157), 2022-12-27
Supplement: s1 [file s1]

# Feasibility of longitudinal ctDNA assessment in patients with uterine and extra-uterine leiomyosarcoma

Maggie Zhou<sup>1</sup>, Nam Bui<sup>1</sup>, Richa Rathore<sup>2</sup>, Sumedha Sudhaman<sup>2</sup>, Giby V. George<sup>2</sup>, Allyson K. Malashevich<sup>2</sup>, Meenakshi Malhotra<sup>2</sup>, Minetta C. Liu<sup>2</sup>, Alexey Aleshin<sup>2</sup> and Kristen N. Ganjoo<sup>1\*</sup>

**Table S1. Patient Characteristics**

| Patient ID | Age at Diagnosis (years) | Sex (F/M) | Disease Setting (Adjuvant/Metastatic) | Disease Location (Intra/Extra-uterine) | Survival Status (Alive/Deceased) | Duration of Follow-up (weeks) | Disease Recurrence/Progression (PD/recurrence, PR/CR, SD) | ctDNA at Last Timepoint | Therapy group (Hormonal, Cytotoxic, Immunotherapy, Targeted) | Mutational Status |
|------------|--------------------------|-----------|---------------------------------------|----------------------------------------|----------------------------------|-------------------------------|-----------------------------------------------------------|-------------------------|--------------------------------------------------------------|-------------------|
| 1          | 55.8                     | F         | Adjuvant                              | Extra-uterine                          | Alive                            | 64.4                          | PD/recurrence                                             | Negative                | Hormonal                                                     | TSC               |
| 2          | 55.6                     | F         | Adjuvant                              | Intra-uterine                          | Alive                            | 85.9                          | SD                                                        | Negative                | N/A                                                          | ATRX, TP53        |
| 3          | 61.4                     | F         | Adjuvant                              | Intra-uterine                          | Alive                            | 61.1                          | SD                                                        | Negative                | Cytotoxic, hormonal                                          | TP53              |
| 4          | 64.0                     | M         | Adjuvant                              | Extra-uterine                          | Alive                            | 45.0                          | SD                                                        | Negative                | Immunotherapy                                                | -                 |
| 5          | 39.9                     | F         | Metastatic                            | Extra-uterine                          | Alive                            | 149.0                         | PD/recurrence                                             | Positive                | Cytotoxic, targeted, immunotherapy                           | ATRX, TP53        |
| 6          | 51.3                     | M         | Metastatic                            | Extra-uterine                          | Alive                            | 347.7                         | PD/recurrence                                             | Positive                | Cytotoxic, targeted, immunotherapy                           | TP53              |

|    |      |   |            |               |       |       |               |          |                                              |                 |
|----|------|---|------------|---------------|-------|-------|---------------|----------|----------------------------------------------|-----------------|
| 7  | 52.2 | F | Metastatic | Intra-uterine | Alive | 73.9  | SD            | Negative | Cytotoxic, hormonal                          | -               |
| 8  | 56.1 | F | Metastatic | Intra-uterine | Alive | 108.9 | PR/CR         | Negative | Cytotoxic                                    | RB1, TP53       |
| 9  | 51.8 | F | Metastatic | Intra-uterine | Alive | 68.6  | PD/recurrence | Negative | Cytotoxic, hormonal                          | TP53            |
| 10 | 50.1 | F | Metastatic | Extra-uterine | Alive | 94.3  | SD            | Positive | Cytotoxic                                    | -               |
| 11 | 58.6 | M | Metastatic | Extra-uterine | Alive | 323.6 | SD            | Positive | Cytotoxic                                    | RB1             |
| 12 | 48.2 | F | Adjuvant   | Intra-uterine | Alive | 33.7  | PD/recurrence | Negative | Cytotoxic                                    | PTEN            |
| 13 | 53.3 | F | Metastatic | Intra-uterine | Alive | 142.9 | SD            | Positive | Cytotoxic, hormonal, immunotherapy, targeted | RB1             |
| 14 | 60.2 | F | Adjuvant   | Intra-uterine | Alive | 19.0  | PR/CR         | Negative | Cytotoxic                                    | ATRX, RB1, TP53 |
| 15 | 50.3 | F | Adjuvant   | Intra-uterine | Alive | 37.1  | PD/recurrence | Positive | Cytotoxic, targeted                          | RB1, TP53       |
| 16 | 35.9 | F | Adjuvant   | Intra-uterine | Alive | 62.9  | SD            | Positive | Cytotoxic, hormonal                          | -               |
| 17 | 82.2 | F | Metastatic | Intra-uterine | Alive | 78.1  | PR/CR         | Negative | Cytotoxic                                    | -               |
| 18 | 63.4 | F | Metastatic | Intra-uterine | Alive | 268.0 | PD/recurrence | Positive | Hormonal, cytotoxic, targeted                | RB1             |

|    |      |   |            |               |       |       |               |          |                                              |           |
|----|------|---|------------|---------------|-------|-------|---------------|----------|----------------------------------------------|-----------|
| 19 | 68.8 | F | Metastatic | Intra-uterine | Alive | 118.6 | PD/recurrence | Positive | Hormonal, cytotoxic, targeted, immunotherapy | -         |
| 20 | 48.6 | F | Adjuvant   | Extra-uterine | Alive | 42.9  | PR/CR         | Negative | Immunotherapy, hormonal                      | -         |
| 21 | 71.7 | F | Metastatic | Extra-uterine | Alive | 49.9  | PD/recurrence | Positive | N/A                                          | RB1, TP53 |
| 22 | 44.3 | F | Metastatic | Intra-uterine | Alive | 41.1  | PR/CR         | Negative | N/A                                          | TP53, TSC |
| 23 | 66.9 | F | Metastatic | Extra-uterine | Alive | 58.4  | SD            | Positive | Hormonal, targeted, immunotherapy            | -         |
| 24 | 48.7 | F | Adjuvant   | Intra-uterine | Alive | 42.7  | PR/CR         | Negative | Hormonal                                     | -         |
| 25 | 65.5 | F | Adjuvant   | Extra-uterine | Alive | 39.3  | PR/CR         | Negative | N/A                                          | RB1, TP53 |
| 26 | 63.5 | F | Metastatic | Intra-uterine | Alive | 57.6  | SD            | Positive | Cytotoxic, Targeted, Immunotherapy           | -         |
| 27 | 52.2 | F | Adjuvant   | Extra-uterine | Alive | 59.0  | PR/CR         | Negative | N/A                                          | -         |
| 28 | 51.8 | F | Metastatic | Extra-uterine | Alive | 93.9  | PD/recurrence | Positive | Immunotherapy, Targeted                      | -         |
| 29 | 42.1 | F | Adjuvant   | Intra-uterine | Alive | 109.1 | PD/recurrence | Positive | Cytotoxic, Hormonal                          | BRCA2     |

|    |      |   |            |               |          |       |               |          |                                              |             |
|----|------|---|------------|---------------|----------|-------|---------------|----------|----------------------------------------------|-------------|
| 30 | 34.2 | F | Metastatic | Intra-uterine | Deceased | 116.3 | PD/recurrence | Positive | Hormonal, Immunotherapy, Targeted, Cytotoxic | -           |
| 31 | 42.1 | F | Metastatic | Intra-uterine | Alive    | 137.4 | PD/recurrence | Positive | Cytotoxic, Targeted                          | -           |
| 32 | 48.4 | F | Adjuvant   | Extra-uterine | Alive    | 55.9  | PR/CR         | Negative | Hormonal                                     | BRCA2, TP53 |
| 33 | 46.9 | F | Adjuvant   | Intra-uterine | Alive    | 76.1  | PR/CR         | Negative | Hormonal                                     | RB1         |
| 34 | 50.7 | F | Metastatic | Intra-uterine | Alive    | 66.4  | PR/CR         | Negative | Targeted, Cytotoxic, Hormonal                | TP53        |

Abbreviations: F; Female, M; Male, PD; progressive disease, PR; partial response, CR; complete remission, SD; stable disease, N/A; not applicable.
